# Supplementary material
Source: Springer Nature journal article supplement (https://www.springermedizin.de/resource/supplementary/12891_2006_267_MOESM2_ESM.pdf/9510898)
Supplement: MOESM2 [file 9510898]

# Ratings by podiatrists & plantar pressure according to GS

number of ratings indicating a region as one with excessively high pressure

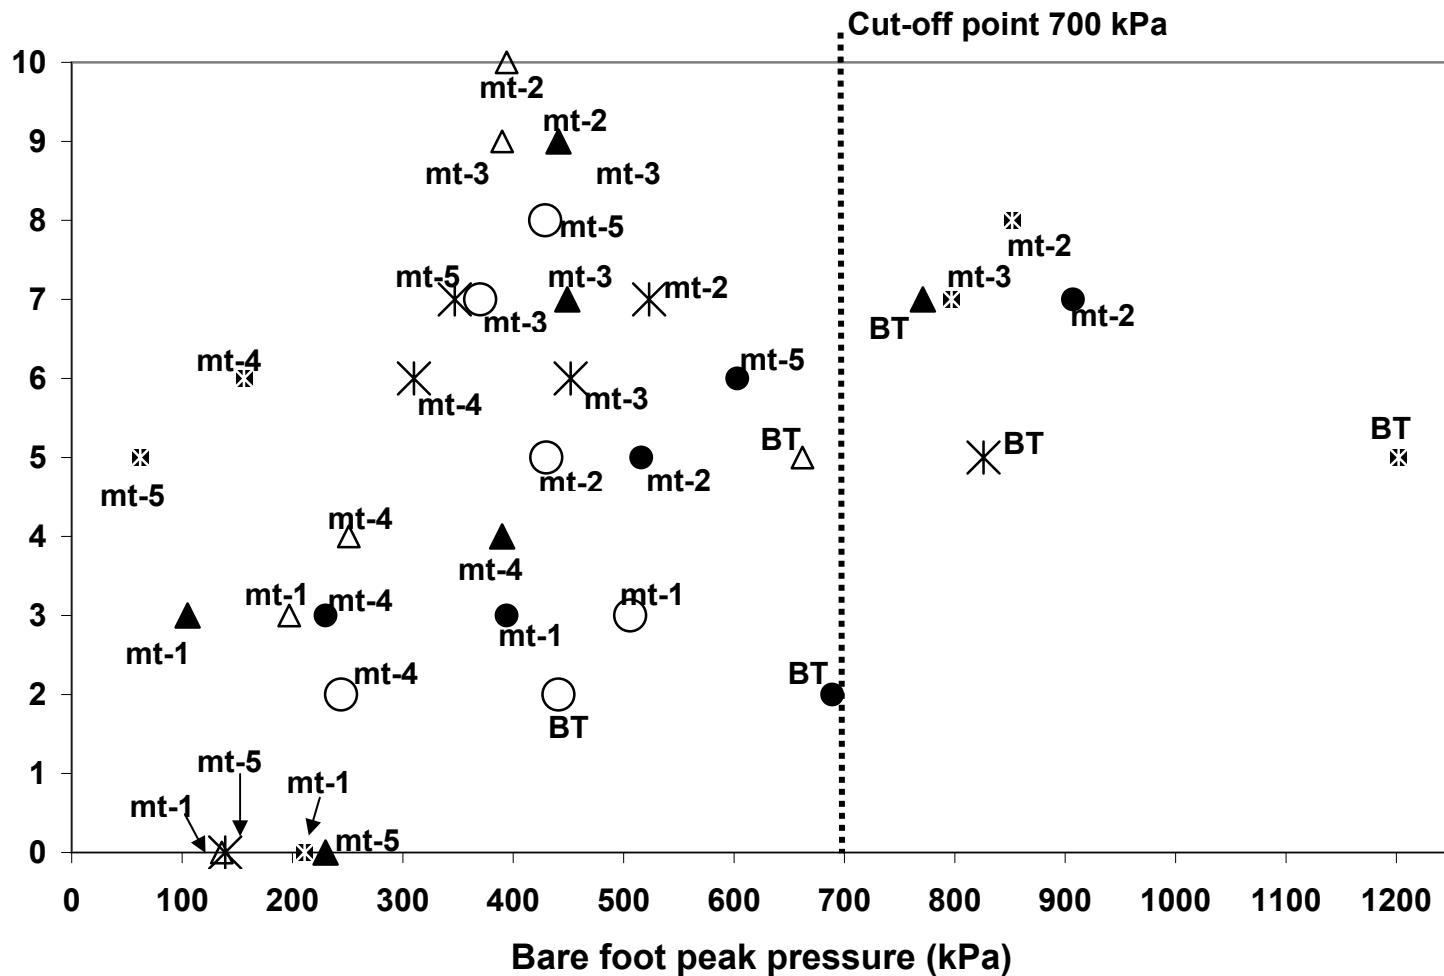

- A left
- A right
- ▲ B left
- △ B right
- \* C left
- ✕ C right
